# Supplementary material for: A Timeline of Bacterial and Archaeal Diversification in the Ocean
Source: bioRxiv or medRxiv preprint supplement (doi:10.1101/2022.10.27.514092), 2023-07-27

**Supplemental File 3**

| Parameter        | Effective Size | Relative difference |
|------------------|----------------|---------------------|
| <b>Loglik</b>    | <b>7</b>       | <b>0.16</b>         |
| <b>Length</b>    | <b>12</b>      | <b>0.30</b>         |
| <b>Sigma</b>     | <b>21</b>      | <b>0.16</b>         |
| <b>Mu</b>        | <b>37</b>      | <b>0.09</b>         |
| <b>Meanrates</b> | <b>19</b>      | <b>0.16</b>         |
| Scale            | 19             | 0.57                |
| Alpha            | 26             | 0.92                |
| <b>Nmode</b>     | <b>70</b>      | <b>0.29</b>         |
| <b>Stat</b>      | <b>8</b>       | <b>0.37</b>         |
| Statalpha        | 20             | 0.94                |
| <b>Kappa</b>     | <b>362</b>     | <b>0.13</b>         |
| Allocent         | 10             | 0.51                |

Number of cycles = 92412; burn-in = 250; sampling = 2 cycles; 4 chains

Supplemental File 4

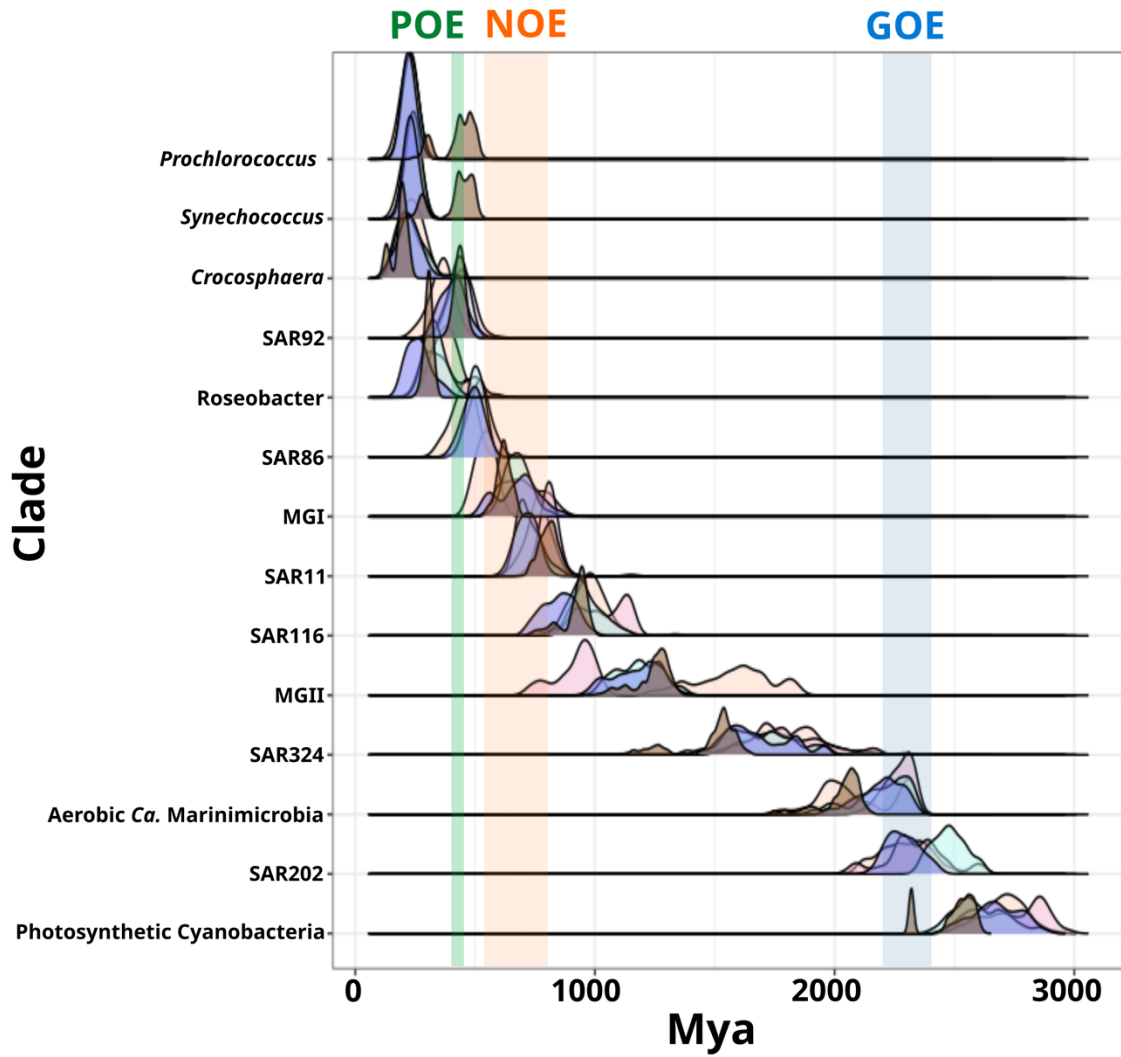

Bayesian chain/method:

Chain 1 Chain 2 Chain 3 Chain 4 TreePL

## Supplemental File 5

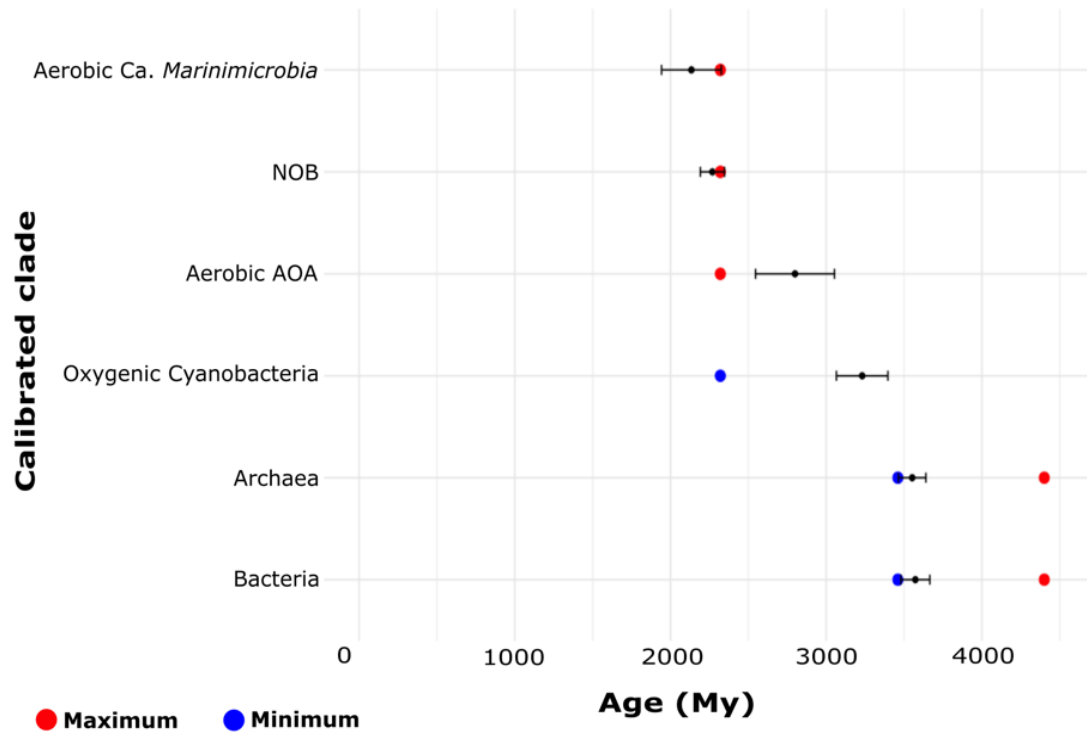

# Supplemental File 7

## Early-branching Clades

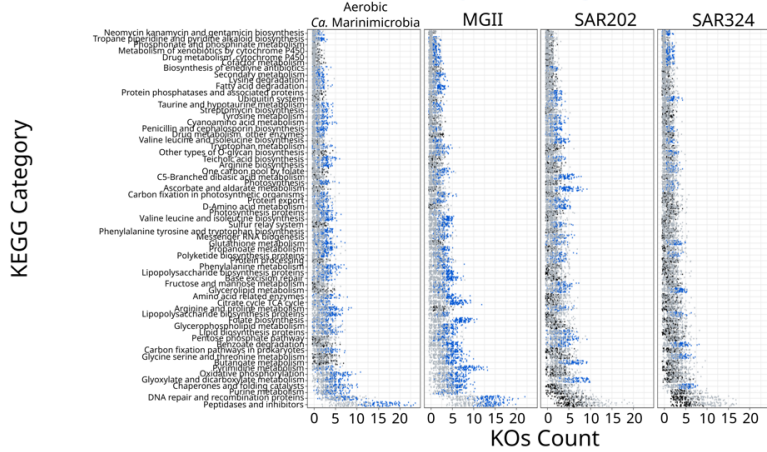

## Late-branching Clades

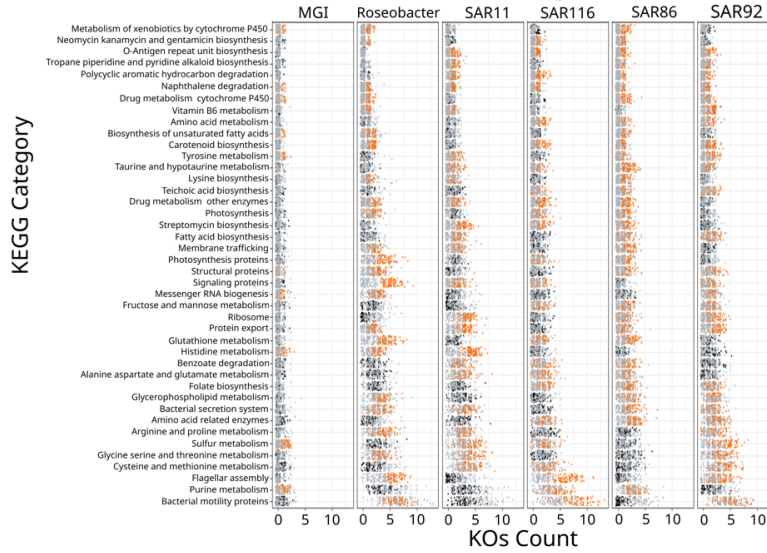

## Late-branching Phototrophs

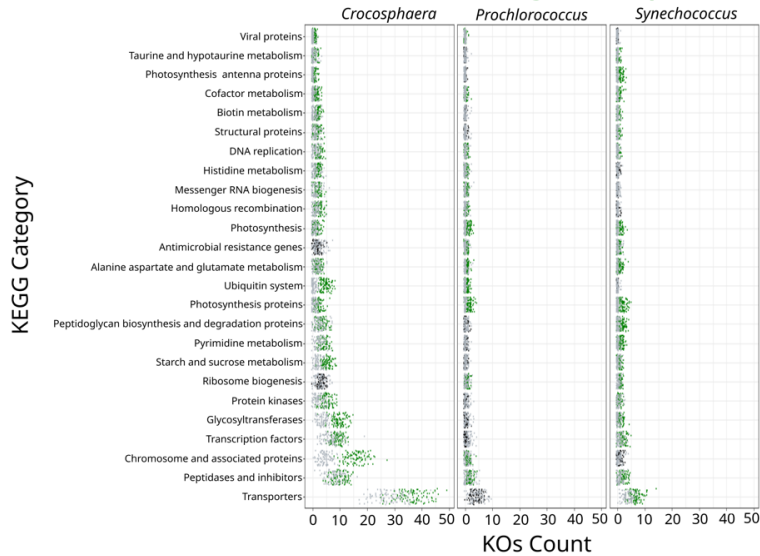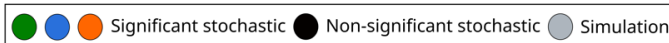

Supplement: Supplementary file [file media-3.pdf]
